# Supplementary material for: Development of a Machine Learning Model to Predict DFU-related Osteomyelitis in Industrial Workers using occupational safety footwear - A study from India
Source: Research Square preprint supplement (doi:10.21203/rs.3.rs-8694836/v1), 2026-02-11

## SUPPLEMENTARY MATERIAL

**Supplementary Table 1 : Comparison between those with and without Diabetic foot ulcer(DFU) related osteomyelitis among those wearing occupational safety footwear**

| <b>Parameter</b>              | <b>Osteomyelitis (n = 71)</b> | <b>No osteomyelitis (n = 36)</b> | <b>p value</b>   |
|-------------------------------|-------------------------------|----------------------------------|------------------|
| <b>Age (years)</b>            | <b>56.8 (8.2)</b>             | <b>49.4 (8.6)</b>                | <b>&lt;0.001</b> |
| <b>Duration of DM (years)</b> | <b>14 {7.6–21.7}</b>          | <b>9 {6.2–17.7}</b>              | <b>0.002</b>     |
| <b>Neuropathy</b>             | <b>42 (59.2%)</b>             | <b>28 (77.8%)</b>                | <b>1.00</b>      |
| <b>LOPS</b>                   | <b>42 (59.2%)</b>             | <b>27 (74.1%)</b>                | <b>0.65</b>      |
| <b>PAD</b>                    | <b>22 (31.0%)</b>             | <b>9 (25.0%)</b>                 | <b>0.05</b>      |
| <b>Foot deformity</b>         | <b>22 (31.0%)</b>             | <b>19 (52.8%)</b>                | <b>0.25</b>      |
| <b>IWGDF risk of foot:</b>    |                               |                                  | <b>0.54</b>      |
| <b>– Grade 0</b>              | <b>5 (7.0%)</b>               | <b>7 (19.4%)</b>                 |                  |
| <b>– Grade 1</b>              | <b>7 (9.9%)</b>               | <b>5 (13.9%)</b>                 |                  |
| <b>– Grade 2</b>              | <b>12 (16.9%)</b>             | <b>9 (25.0%)</b>                 |                  |
| <b>– Grade 3</b>              | <b>29 (40.8%)</b>             | <b>15 (41.7%)</b>                |                  |
| <b>HbA1c (%)</b>              | <b>8.7 (2.5)</b>              | <b>8.3 (2.5)</b>                 | <b>0.47</b>      |
| <b>ASCVD</b>                  | <b>29 (40.8%)</b>             | <b>13 (36.1%)</b>                | <b>0.08</b>      |

|                                 |                   |                   |                  |
|---------------------------------|-------------------|-------------------|------------------|
| <b>DKD</b>                      | <b>15 (21.1%)</b> | <b>7 (19.4%)</b>  | <b>0.37</b>      |
| <b>Site of DFU:</b>             |                   |                   |                  |
| <b>– Forefoot</b>               | <b>44 (62.0%)</b> | <b>29 (80.6%)</b> | <b>0.65</b>      |
| <b>– Midfoot</b>                | <b>21 (29.6%)</b> | <b>8 (22.2%)</b>  | <b>0.05</b>      |
| <b>– Hindfoot</b>               | <b>8 (11.3%)</b>  | <b>10 (27.8%)</b> | <b>0.09</b>      |
| <b>– Multi-site</b>             | <b>19 (26.8%)</b> | <b>10 (27.8%)</b> | <b>0.41</b>      |
| <b>– Dorsum</b>                 | <b>36 (50.7%)</b> | <b>18 (50.0%)</b> | <b>0.16</b>      |
| <b>SINBAD score</b>             | <b>4.0 (1.2)</b>  | <b>2.8 (1.1)</b>  | <b>&lt;0.001</b> |
| <b>Intertrigo</b>               | <b>38 (53.5%)</b> | <b>23 (63.9%)</b> | <b>0.41</b>      |
| <b>Onychomycoses</b>            | <b>28 (39.4%)</b> | <b>18 (50.0%)</b> | <b>0.85</b>      |
| <b>Osteomyelitis recurrence</b> | <b>15 (21.1%)</b> | <b>13 (36.1%)</b> | <b>0.54</b>      |
| <b>Past amputation</b>          | <b>15 (21.1%)</b> | <b>4 (11.1%)</b>  | <b>0.024</b>     |
| <b>Polymicrobial infection</b>  | <b>8 (11.3%)</b>  | <b>7 (19.4%)</b>  | <b>0.61</b>      |
| <b>Gram positive</b>            | <b>9 (12.7%)</b>  | <b>12 (33.3%)</b> | <b>0.07</b>      |
| <b>Gram negative</b>            | <b>33 (46.5%)</b> | <b>15 (41.7%)</b> | <b>0.05</b>      |
| <b>Both Gram+ and Gram–</b>     | <b>5 (7.0%)</b>   | <b>7 (19.4%)</b>  | <b>0.27</b>      |
| <b>MDRO</b>                     | <b>2 (2.8%)</b>   | <b>7 (19.4%)</b>  | <b>0.02</b>      |
| <b>Footwear at work:</b>        |                   |                   | <b>0.46</b>      |

|                            |                 |                 |        |
|----------------------------|-----------------|-----------------|--------|
| – Never                    | 9 (12.7%)       | 3 (8.3%)        |        |
| – Intermittent             | 22 (31.0%)      | 11 (30.6%)      |        |
| – All the time             | 33 (46.5%)      | 15 (41.7%)      |        |
| Footwear change ≤ 6 months | 12 (16.9%)      | 18 (50.0%)      | <0.001 |
| Footwear change > 6 months | 41 (57.7%)      | 18 (50.0%)      |        |
| Leukocyte count            | 9353.5 (4501.6) | 8739.3 (4710.7) | 0.49   |
| CRP (mg/L)                 | 107.4 (42.2)    | 45.1 (29.3)     | 0.001  |
| Procalcitonin (ng/mL)      | 7.8 (13.4)      | 4.0 (10.2)      | 0.10   |

Parameters are expressed as mean (SD) or median {IQR} for quantitative and n(%) for categorical variables.

Abbreviations used : DM = Diabetes Mellitus, IWDGF = International Working Group for Diabetic foot LOPS = Loss of

Protective Sensation, PAD = Peripheral Arterial Disease, HbA1c% = Glycated Hb, ASCVD = Atherosclerotic cardiovascular

disease, DKD = Diabetic kidney disease, SINBAD = Site, Ischemia, Neuropathy, Bacterial infection, Area, Depth, MDRO =

Multi drug resistant organisms, CRP = C-reactive protein

**Supplementary Figure 1 : Confusion matrix for XGBoost model predicting diabetic foot osteomyelitis in occupational footwear users**

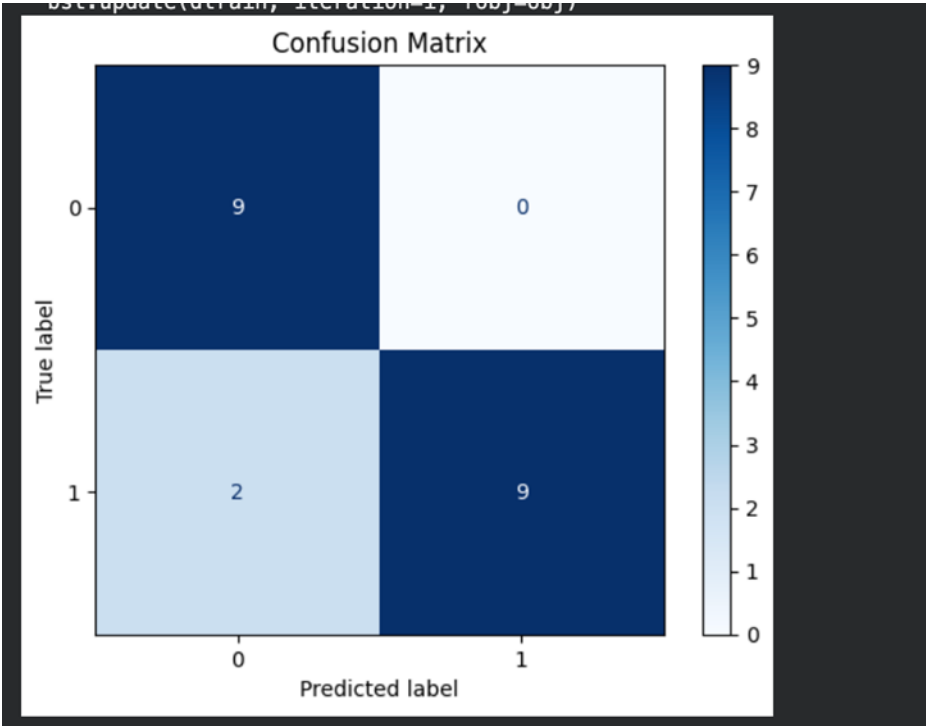

Supplement: Supplementary file 1 [file dc23bf7e8671d9659750eb83.pdf]
